# Supplementary material
Source: HighWire-hosted journal article supplement (https://bmjopen.bmj.com/content/6/4/e010773)
Supplement: inline-supplementary-material-1 [file inline-supplementary-material-1.pdf]

## **Appendix 1.** Interview schedule

| <b>Interview topics</b>                   | <b>Key interview questions</b>                                                                                                                                                                                                                                                                                                                                                           |
|-------------------------------------------|------------------------------------------------------------------------------------------------------------------------------------------------------------------------------------------------------------------------------------------------------------------------------------------------------------------------------------------------------------------------------------------|
| 1. General health-related decision-making | → What do you usually do when you have to make a decision concerning your own health?<br>→ Why?                                                                                                                                                                                                                                                                                          |
| 2. Child's health-related decision-making | → Now think about the last time you had to make a health-related decision for your child. What did you do?<br>→ Why?                                                                                                                                                                                                                                                                     |
| 3. MMR vaccination decision-making        | → How are you making a decision regarding your child's MMR vaccination?<br>→ What are you taking into consideration?<br>→ How do you feel about making this decision?<br>→ Which experiences are helping or hindering you in making this decision?                                                                                                                                       |
| 4. Meaningfulness                         | → What are the major decisions that you have made for your child so far?<br>→ How important is your choice about the MMR vaccination compared to other decisions made for your child so far?<br>→ Why is it more or less important than others are?<br>→ What makes it important?                                                                                                        |
| 5. Autonomy                               | → In your opinion, what does it mean to be autonomous in making an MMR vaccination decision for your child?<br>→ Is it important to be autonomous?                                                                                                                                                                                                                                       |
| 6. Competence                             | → What makes one able to make a sound decision about MMR?<br>→ Think of a competent parent who makes a sound MMR decision. Which skills does he or she have?<br>→ What skills would one need to have in order to feel able?<br>→ What does one need to know?<br>→ Can you mention three skills that one needs to have to be competent?<br>→ What is important for you to know right now? |
| 7. Shared decision-making                 | → Think of the meeting with the pediatrician when the topic of childhood vaccinations is discussed for the first time. How should it happen, in an ideal world?<br>→ How did it take place, in your case (if any)?                                                                                                                                                                       |
| 8. Gender roles                           | → How do you and your partner share the MMR vaccination decision, if you do?                                                                                                                                                                                                                                                                                                             |
| 9. Reasons for participation              | → Why did you decide to participate in this study?                                                                                                                                                                                                                                                                                                                                       |
